# Supplementary material for: Cardiac inotropy, lusitropy, and Ca2+ handling with major metabolic substrates in rat heart
Source: PubMed Central journal article supplement (PMC5138277; doi:10.1007/s00424-016-1892-8), 2016-10-28
Supplement: 424_2016_1892_MOESM1_ESM.pdf [file 424_2016_1892_MOESM1_ESM.pdf]

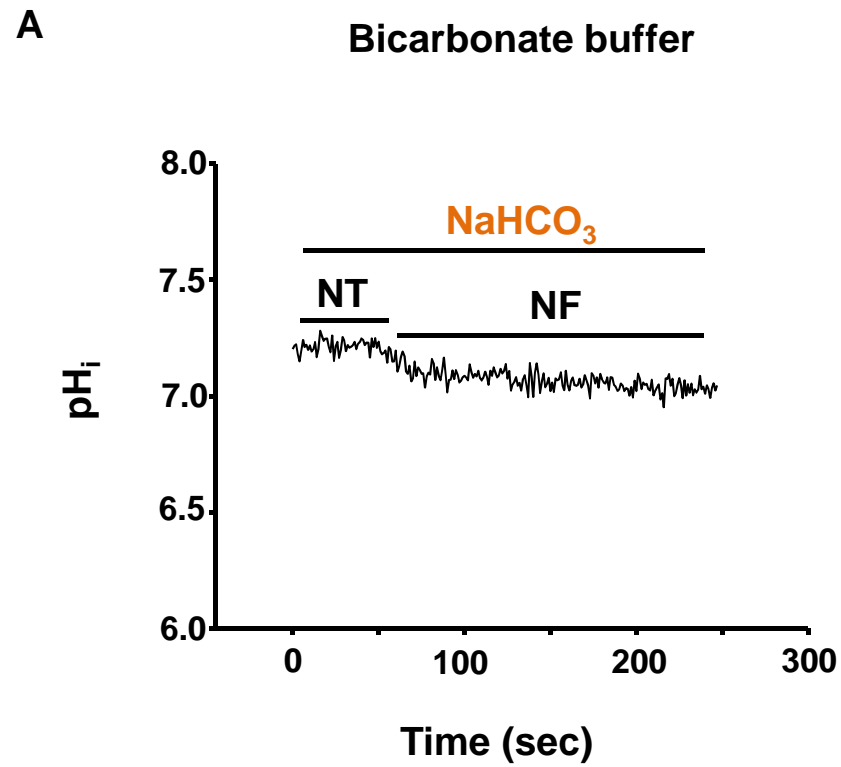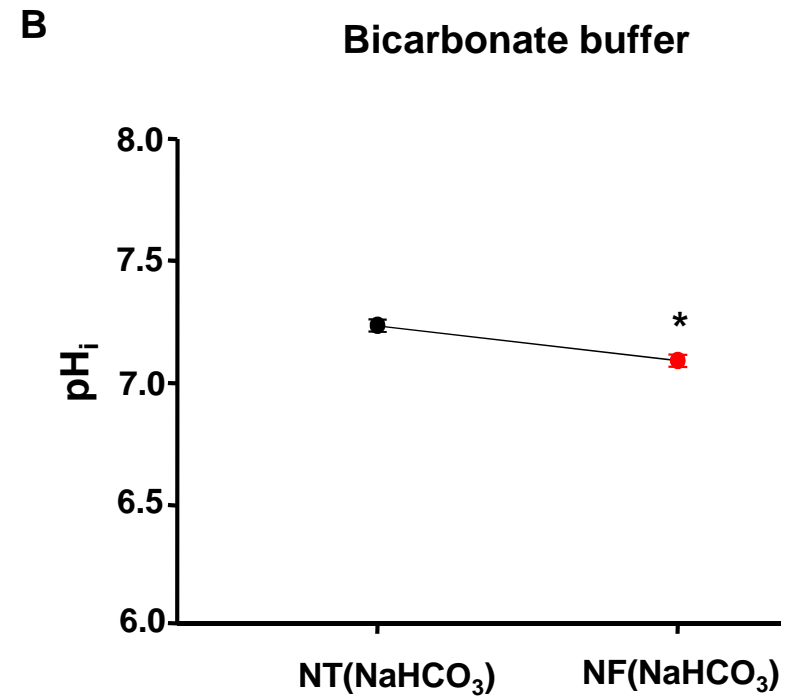

Supplementary figure 1
